# Supplementary material for: De novo mutations in the GTP/GDP-binding region of RALA, a RAS-like small GTPase, cause intellectual disability and developmental delay
Source: PLOS journal article supplement (doi:10.1371/journal.pgen.1007671), 2018-11-30
Supplement: S9 (10.1371/journal.pgen.1007671.s009) [file journal.pgen.1007671.s009]

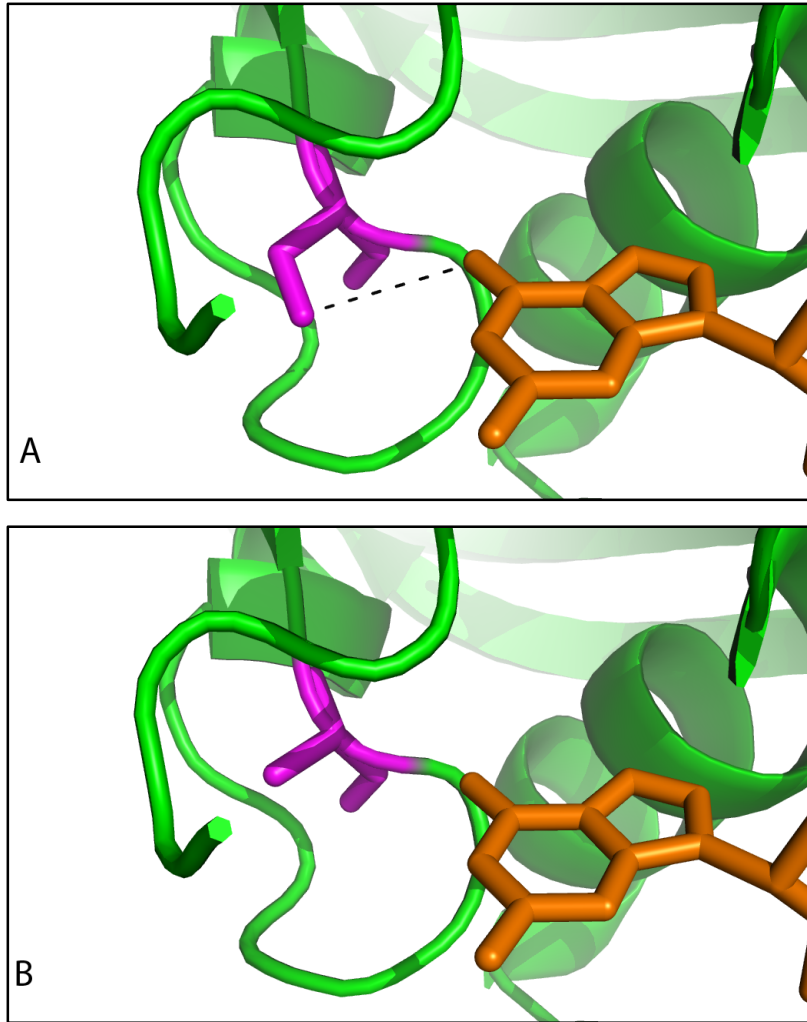

**S4 Figure. Detailed view of the wild type S157 residue and its substitution S157A.** Panel A shows the serine residue (in magenta) with its hydrogen bond with GDP (black dashed line, GDP in orange). Panel B shows the substitution for alanine (magenta) unable to form the hydrogen bond.
