# Supplementary material for: De novo mutations in the GTP/GDP-binding region of RALA, a RAS-like small GTPase, cause intellectual disability and developmental delay
Source: PLOS journal article supplement (doi:10.1371/journal.pgen.1007671), 2018-11-30
Supplement: S11 (10.1371/journal.pgen.1007671.s011) [file journal.pgen.1007671.s011]

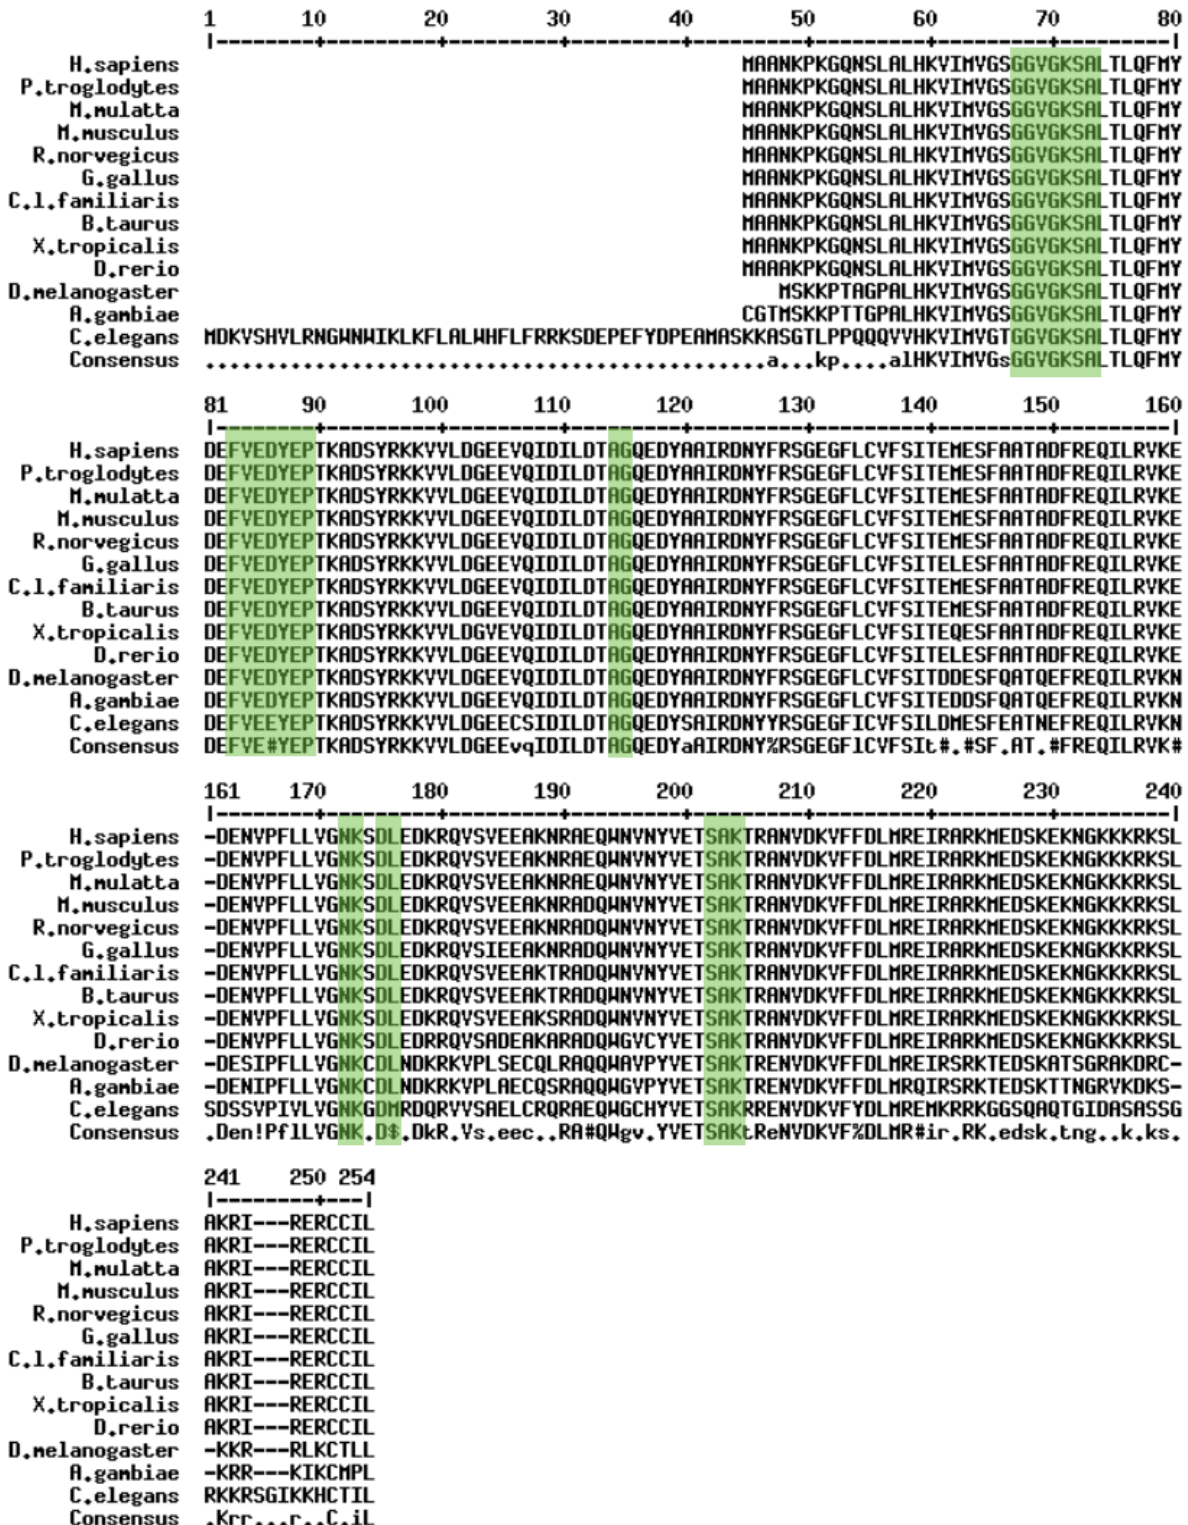

**S6 Figure. Alignment of RALA protein sequences across various species.** Protein reference sequences of RALA homologs as defined by HomoloGene (NCBI, hid=3942) were aligned using MultAlin (<http://multalin.toulouse.inra.fr/multalin/multalin.html>). Residues comprising the

GTP/GDP-binding region as defined by computational modeling are highlighted in green. For the Consensus row, uppercase represents a residue conserved across all sequences, lowercase represents a residues conserved across at least half of the sequences, and the following symbols represent one of multiple residues: !, I or V; \$, L or M; %, F or Y; #, one of N, B, Q, E, B or Z.
